# Supplementary material for: Efficacy of certolizumab pegol on signs and symptoms of axial spondyloarthritis including ankylosing spondylitis: 24-week results of a double-blind randomised placebo-controlled Phase 3 study
Source: PubMed Central journal article supplement — Ann Rheum Dis. 2013 Sep 6;73(1):39–47. doi: 10.1136/annrheumdis-2013-204231 (PMC3888598; doi:10.1136/annrheumdis-2013-204231), 2013-09-06

## SUPPLEMENTARY MATERIAL

**Table S1. Summary of hierarchical testing procedure of primary and key secondary efficacy variables**

| <b>Efficacy variables presented in order of hierarchical testing</b>         | <b>p-value</b>      | <b>Significant <sup>a</sup></b> |
|------------------------------------------------------------------------------|---------------------|---------------------------------|
| Step 1: ASAS20 responder rate at Week 12 for CZP 200mg vs PBO                | 0.004 <sup>b</sup>  | Yes                             |
| Step 2: ASAS20 responder rate at Week 12 for CZP 400mg vs PBO                | <0.001 <sup>b</sup> | Yes                             |
| Step 3: ASAS20 responder rate at Week 24 for CZP 200mg vs PBO                | <0.001 <sup>b</sup> | Yes                             |
| Step 4: ASAS20 responder rate at Week 24 for CZP 400mg vs PBO                | <0.001 <sup>b</sup> | Yes                             |
| Step 5: Change from Baseline in BASFI at Week 12 for CZP 200mg+400mg vs PBO  | <0.001 <sup>c</sup> | Yes                             |
| Step 6: Change from Baseline in BASDAI at Week 12 for CZP 200mg+400mg vs PBO | <0.001 <sup>c</sup> | Yes                             |
| Step 7: Change from Baseline in BASFI at Week 24 for CZP 200mg+400mg vs PBO  | <0.001 <sup>c</sup> | Yes                             |
| Step 8: Change from Baseline in BASDAI at Week 24 for CZP 200mg+400mg vs PBO | <0.001 <sup>c</sup> | Yes                             |
| Step 9: Change from Baseline in BASMI at Week 12 for CZP 200mg+400mg vs PBO  | <0.001 <sup>c</sup> | Yes                             |
| Step 10: Change from Baseline in BASMI at Week 24 for CZP 200mg+400mg vs PBO | <0.001 <sup>c</sup> | Yes                             |

ASAS20: Assessment in Axial Spondyloarthritis International Society 20% response criteria; BASDAI: Bath Ankylosing Spondylitis Disease Activity Index; BASFI: Bath Ankylosing Spondylitis Functional Index; BASMI linear: Bath Ankylosing Spondylitis Metrology Index linear; a Statistical significance was assessed in the context of the hierarchical testing procedure. Each step was tested at 0.05 two-sided. If the result was not significant at any step, then all steps after that were considered not statistically significant. b p-value was estimated from standard 2-sided Wald asymptomatic test with a 5% alpha level. c p-value was estimated from the ANCOVA model with treatment, region, mNY criteria (Y/N), and prior TNF inhibitor exposure (Y/N) as factors, and baseline score as a covariate.

**Table S2: Baseline characteristics of the AS and nr-axSpA subpopulations by treatment group**

|                                    | AS                |                            |                            | nr-axSpA          |                            |                            |
|------------------------------------|-------------------|----------------------------|----------------------------|-------------------|----------------------------|----------------------------|
|                                    | Placebo<br>(n=57) | CZP 200mg<br>Q2W<br>(n=65) | CZP 400mg<br>Q4W<br>(n=56) | Placebo<br>(n=50) | CZP 200mg<br>Q2W<br>(n=46) | CZP 400mg<br>Q4W<br>(n=51) |
| <b>Demographic characteristics</b> |                   |                            |                            |                   |                            |                            |
| Age, mean yrs (SD)                 | 41.6 (12.8)       | 41.0 (10.8)                | 41.9 (11.5)                | 38.0 (11.8)       | 36.6 (13.0)                | 37.5 (10.8)                |
| Male, %                            | 71.9              | 72.3                       | 73.2                       | 48.0              | 43.5                       | 52.9                       |
| <b>AxSpA characteristics</b>       |                   |                            |                            |                   |                            |                            |

|                                          |                      |                      |                      |                      |                     |                      |
|------------------------------------------|----------------------|----------------------|----------------------|----------------------|---------------------|----------------------|
| Symptom duration, median, yrs (min, max) | 10.2<br>(0.3, 50.9)  | 8.8<br>(0.3, 32.7)   | 8.8<br>(0.3, 44.8)   | 4.5<br>(0.5, 41.5)   | 4.8<br>(0.3, 34.2)  | 7.3<br>(0.3, 25.3)   |
| Symptom duration < 5 years, n (%)        | 16 (28.1)            | 26 (40.0)            | 15 (26.8)            | 26 (52.0)            | 24 (52.2)           | 19 (37.3)            |
| Definitive sacroiliitis on X-ray         | 57 (100.0)           | 65 (100.0)           | 56 (100.0)           | 0 (0.0)              | 0 (0.0)             | 0 (0.0)              |
| Positive for HLA-B27, n (%)              | 48 (84.2)            | 53 (81.5)            | 44 (78.6)            | 39 (78.0)            | 34 (73.9)           | 37 (72.5)            |
| CRP mg/L                                 |                      |                      |                      |                      |                     |                      |
| Median, (min, max)                       | 16.6<br>(1.4, 155.6) | 14.0<br>(0.1, 174.8) | 12.9<br>(0.7, 159.9) | 13.5<br>(0.2, 156.2) | 10.0<br>(2.0, 52.0) | 12.1<br>(0.1, 120.0) |
| > ULN, n (%)                             | 45 (78.9)            | 48 (73.8)            | 37 (66.1)            | 32 (64.0)            | 27 (58.7)           | 34 (66.7)            |
| >15 mg/L, n (%)                          | 31 (54.5)            | 27 (41.5)            | 22 (39.3)            | 22 (44.0)            | 15 (32.6)           | 16 (31.4)            |
| BASDAI, <sup>#</sup> Mean (SD)           | 6.4 (1.9)            | 6.5 (1.7)            | 6.2 (1.3)            | 6.4 (1.5)            | 6.5 (1.4)           | 6.6 (1.6)            |
| BASFI, <sup>#</sup> Mean (SD)            | 6.0 (2.0)            | 5.6 (2.3)            | 5.7 (2.3)            | 4.9 (2.2)            | 4.8 (2.2)           | 5.1 (2.4)            |
| BASMI, <sup>#</sup> Mean (SD)            | 4.7 (1.6)            | 4.2 (1.6)            | 4.3 (1.8)            | 3.1 (1.6)            | 3.1 (1.4)           | 3.3 (1.5)            |
| ASDAS, <sup>#</sup> Mean (SD)            | 4.1 (0.9)            | 4.0 (1.0)            | 3.8 (0.8)            | 3.8 (0.9)            | 3.7 (0.8)           | 3.8 (0.8)            |
| Arthritis, <sup>†</sup> n (%)            | 30 (52.6)            | 39 (60.0)            | 27 (48.2)            | 31 (62.0)            | 23 (50.0)           | 26 (51.0)            |
| <b>Prior and concomitant medication</b>  |                      |                      |                      |                      |                     |                      |
| Concomitant NSAIDs, n (%)                | 51 (89.5)            | 59 (90.8)            | 51 (91.1)            | 41 (82.0)            | 38 (82.6)           | 44 (86.3)            |
| Concomitant DMARDs, n (%)                | 22 (38.6)            | 21 (32.3)            | 20 (35.8)            | 16 (32.0)            | 10 (21.7)           | 11 (21.6)            |
| Prior anti-TNF $\alpha$ exposure, n (%)  | 16 (28.1)            | 11 (16.9)            | 9 (16.1)             | 10 (20.0)            | 4 (8.7)             | 2 (3.9)              |

Data refers to the overall patient population (RS). axSpA: axial spondyloarthritis; CZP: certolizumab pegol; Q2W: every 2 weeks; Q4W: every 4 weeks; SD: standard deviation, HLA-B27: human leukocyte antigen B27; CRP: C-reactive protein; ULN: upper limit of normal; BASDAI: Bath Ankylosing Spondylitis Disease Activity Index; BASFI: Bath Ankylosing Spondylitis Functional Index; BASMI linear: Bath Ankylosing Spondylitis Metrology Index linear; ASDAS: Ankylosing Spondylitis Disease Activity Score; NSAIDs: Non-steroidal anti-inflammatory drugs; DMARDs: Disease modifying anti-rheumatic drugs; TNF $\alpha$ : tumor necrosis factor alpha; AS: ankylosing spondylitis; nr-axSpA: non-radiographic axial spondyloarthritis. <sup>#</sup> in Full Analysis Set data set; <sup>†</sup> current and/or historical; CRP ULN = 7.9 mg/L.

**Table S3. TEAEs by treatment group with an incidence of  $\geq 5\%$  in either CZP group during the 24 week, placebo-controlled, double-blind phase**

| <b>System Organ Class<br/>Preferred Term</b> | <b>Placebo*<br/>N=107<br/>n (%)</b> | <b>CZP 200 mg<br/>Q2W N=111<br/>n (%)</b> | <b>CZP 400 mg Q4W<br/>N=107<br/>n (%)</b> |
|----------------------------------------------|-------------------------------------|-------------------------------------------|-------------------------------------------|
| Infections and infestations                  | 14 (13.1)                           | 19 (17.1)                                 | 16 (15.0)                                 |
| Nasopharyngitis                              | 7 (6.5)                             | 11 (9.9)                                  | 11 (10.3)                                 |
| Upper respiratory tract infections           | 3 (2.8)                             | 6 (5.4)                                   | 4 (3.7)                                   |
| Investigations                               | 2 (1.9)                             | 7 (6.3)                                   | 6 (5.6)                                   |
| Blood creatine phosphokinase increased       | 2 (1.9)                             | 7 (6.3)                                   | 6 (5.6)                                   |
| Nervous system disorders                     | 7 (6.5)                             | 7 (6.3)                                   | 9 (8.4)                                   |
| Headache                                     | 7 (6.5)                             | 7 (6.3)                                   | 9 (8.4)                                   |

\*Placebo escape at Week 16. Data not adjusted for exposure.

**Figure S1. Kinetics of BASFI, BASDAI, BASMI Linear and ASDAS response from Week 0 to Week 24 in axSpA population**

Data refers to the full analysis set (FAS) population. **A**, BASFI; **B**, BASDAI; **C**, BASMI linear; and **D**, ASDAS absolute values in the three treatment groups from Week 0 to Week 24. \*  $p < 0.001$  for CZP vs. PBO.

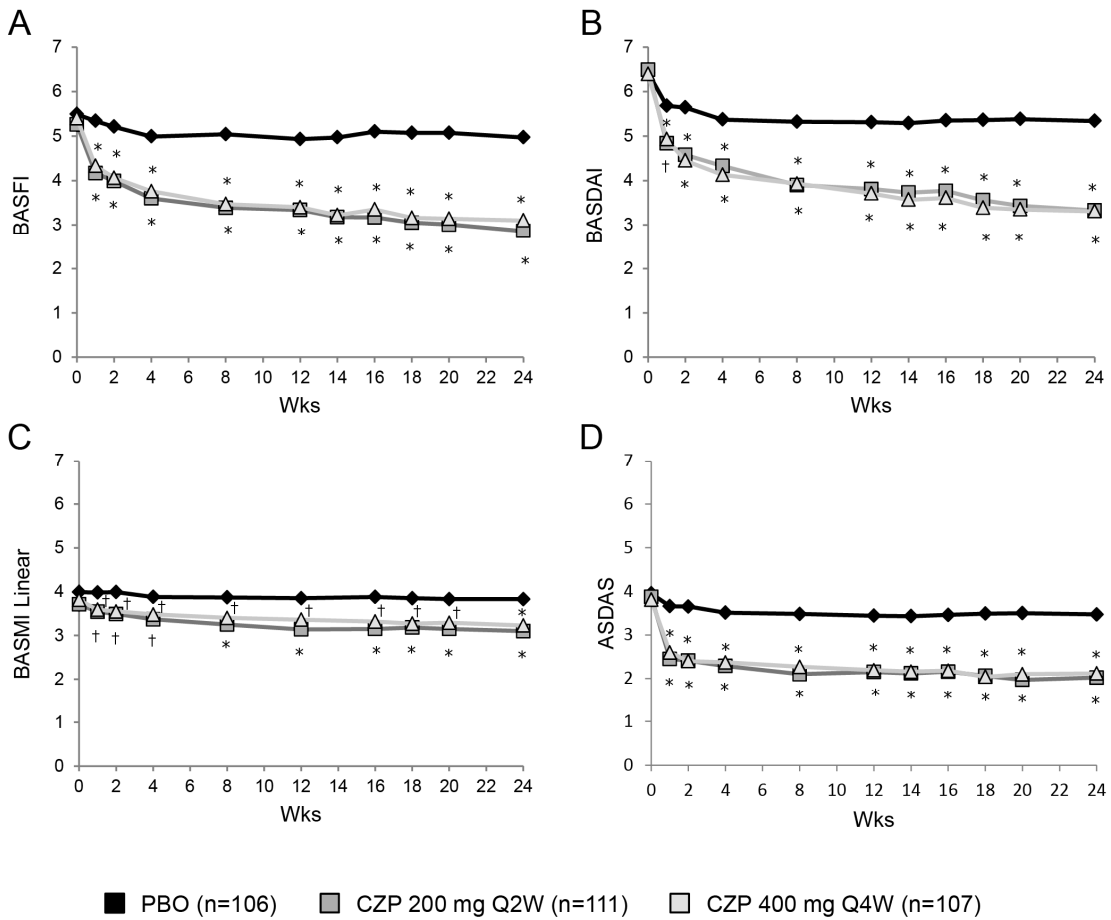

**Figure S2. Logistic regression analysis of treatment interaction for AS and nr-axSpA subpopulations as defined by Local Assessment and Central Assessment X-rays.**

Data refers to the full analysis set (FAS) population. Odds ratios (OR) and confidence intervals (CIs) for achieving ASAS20 response represent all CZP vs placebo groups, respectively. **A**, Subpopulation based on local X-rays (Local Assessment); **B**, Subpopulation based on centralized X-rays (Central Assessment)

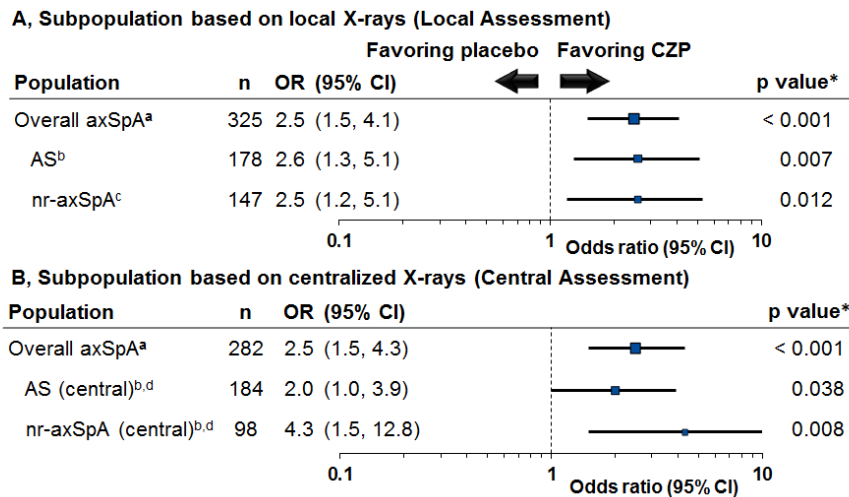

<sup>a</sup> With treatment, region, prior TNF exposure, and NY status as factors; <sup>b</sup> With treatment, region, and prior TNF exposure as factors; <sup>c</sup> With treatment and region as factors. <sup>d</sup> Based on central reading of baseline x-rays; \* Nominal p value Randomized Set (NRI).

**Figure S3. Kinetics of ASDAS, BASDAI, BASFI, and BASMI Linear response from Week 0 to Week 24 in the AS and nr-axSpA subpopulations**

Data refers to the full analysis set (FAS) population. **A**, ASDAS; **B**, BASDAI; **C**, BASFI; and **D**, BASMI linear absolute values in the three treatment groups from Week 0 to Week 24. \*  $p < 0.001$ ; †  $p < 0.05$  CZP vs. PBO.

■ PBO    ■ CZP 200 mg Q2W    □ CZP 400 mg Q4W

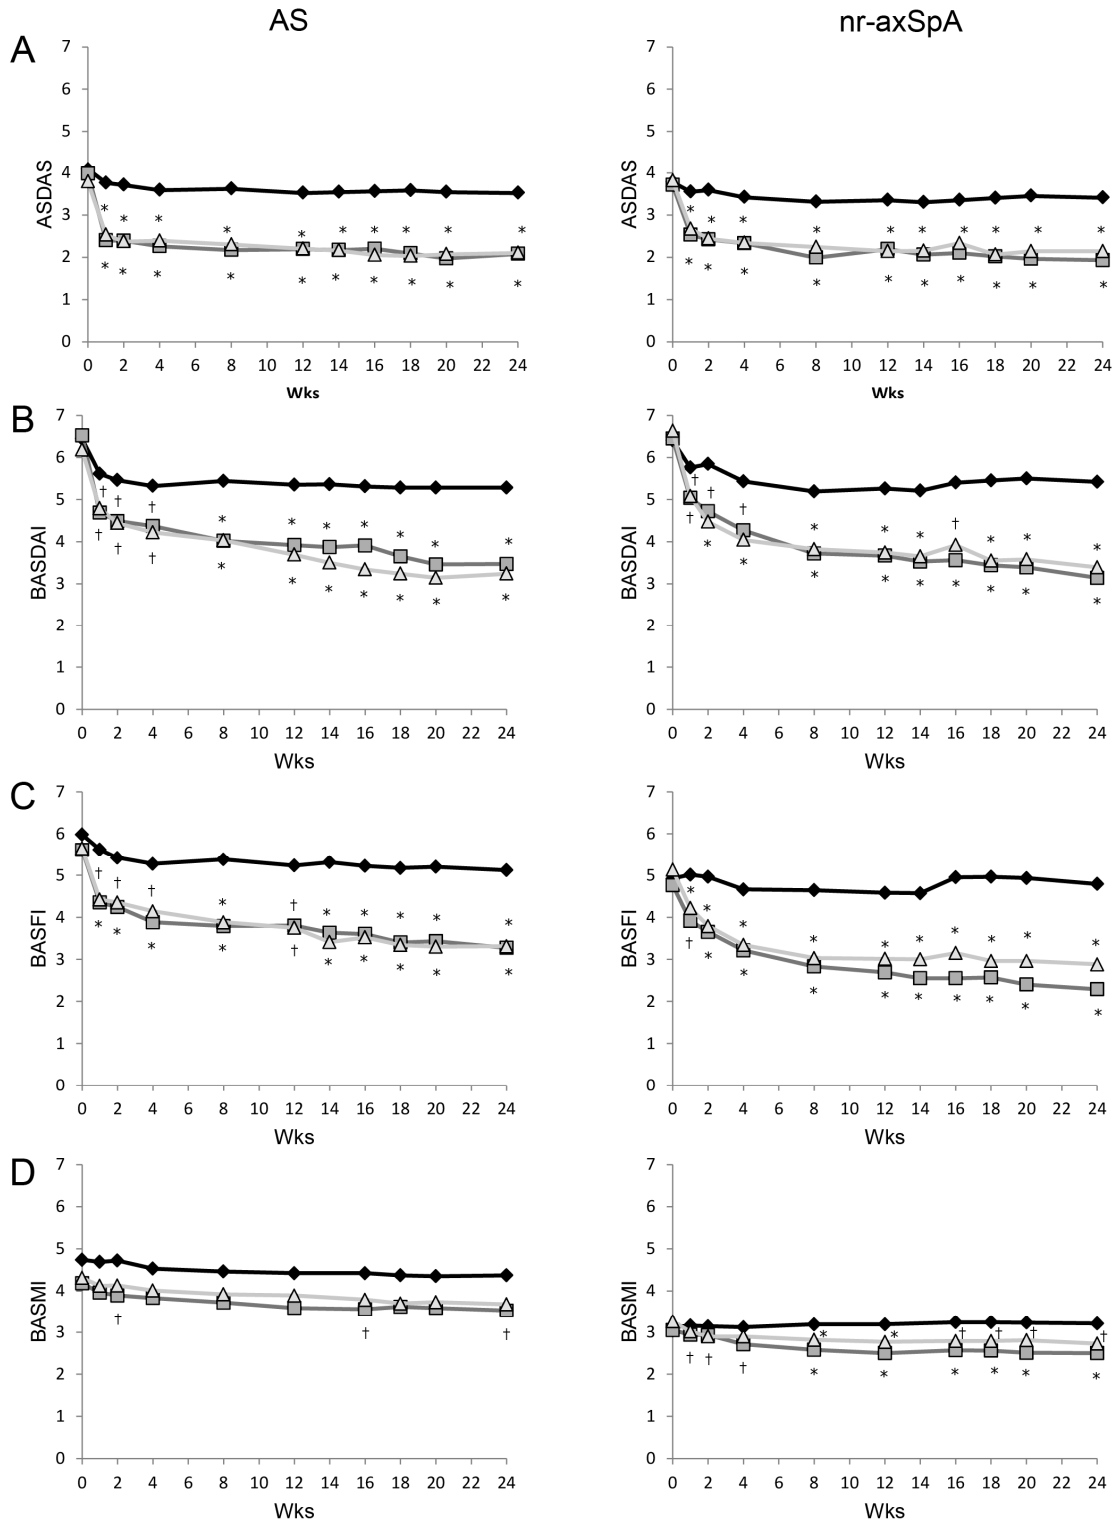

Supplement: annrheumdis-2013-204231-s1.pdf [file annrheumdis-2013-204231-s1.pdf]
